# Supplementary material for: A Simple Cloning-free Method to Efficiently Induce Gene Expression Using CRISPR/Cas9
Source: PubMed Central journal article supplement — Mol Ther Nucleic Acids. 2018 Nov 20;14:184–91. doi: 10.1016/j.omtn.2018.11.008 (PMC6307107; doi:10.1016/j.omtn.2018.11.008), 2018-11-20
Supplement: mmc1.pdf [file mmc1.pdf]

**OMTN, Volume 14**

## **Supplemental Information**

### **A Simple Cloning-free Method to Efficiently Induce Gene Expression Using CRISPR/Cas9**

**Lyuji Fang, Sandy S.C. Hung, Jennifer Yek, Layal El Wazan, Tu Nguyen, Shahnaz Khan, Shiang Y. Lim, Alex W. Hewitt, and Raymond C.B. Wong**

**Supplementary information:**

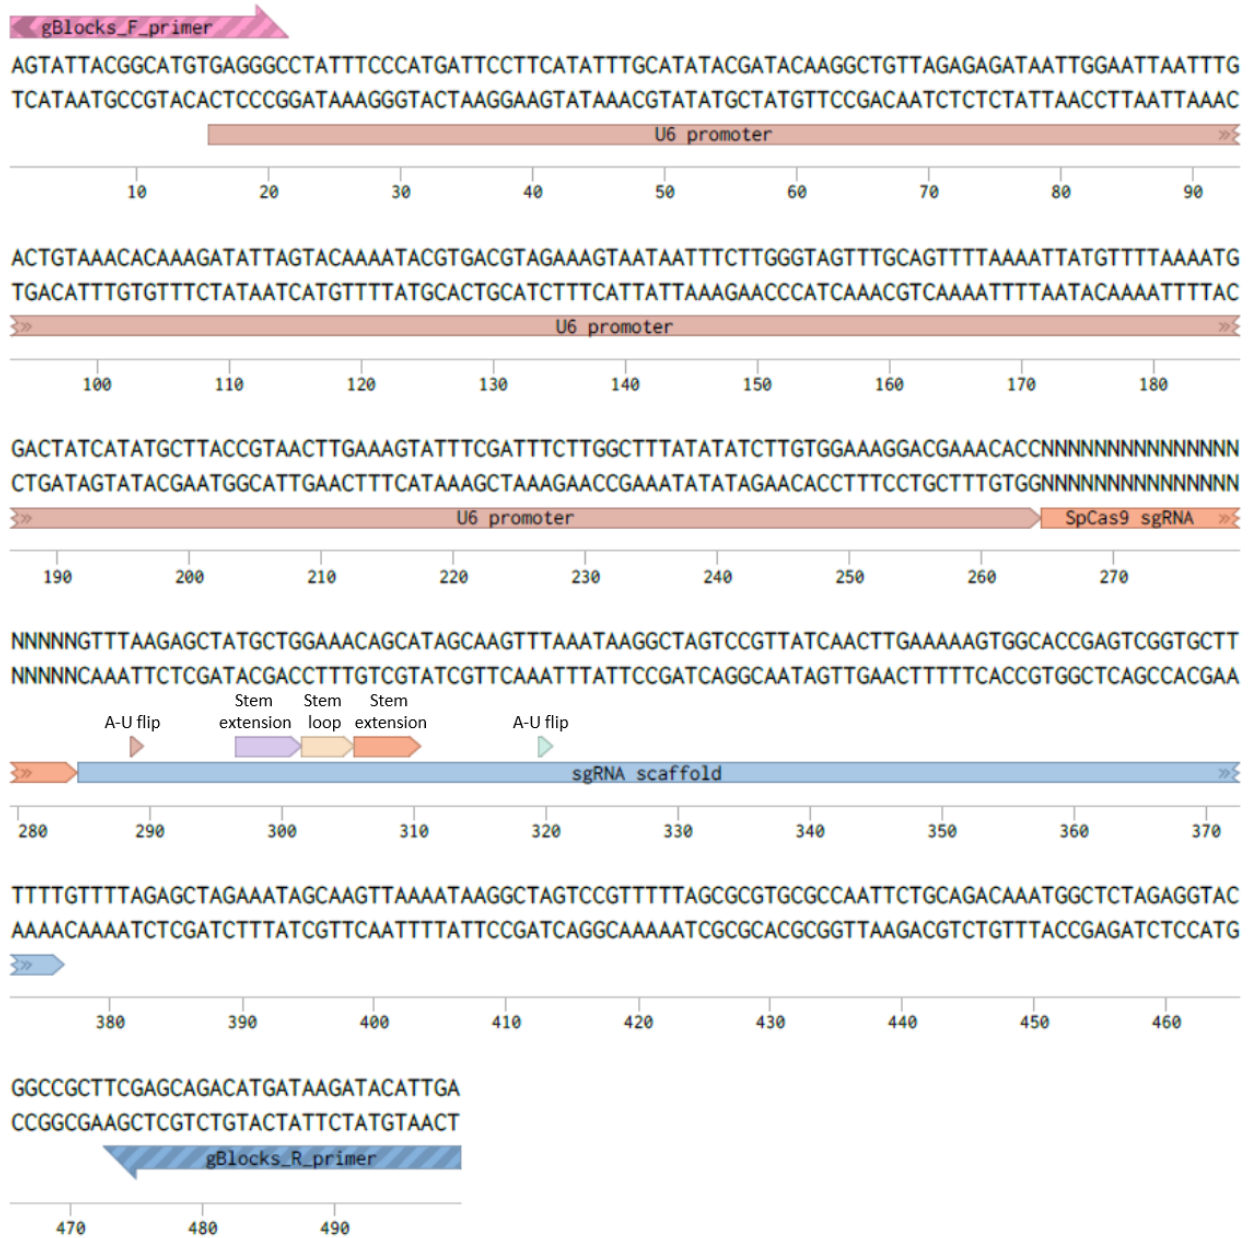

**Supplementary figure 1:** Design of sgRNA expression cassette for SpCas9.

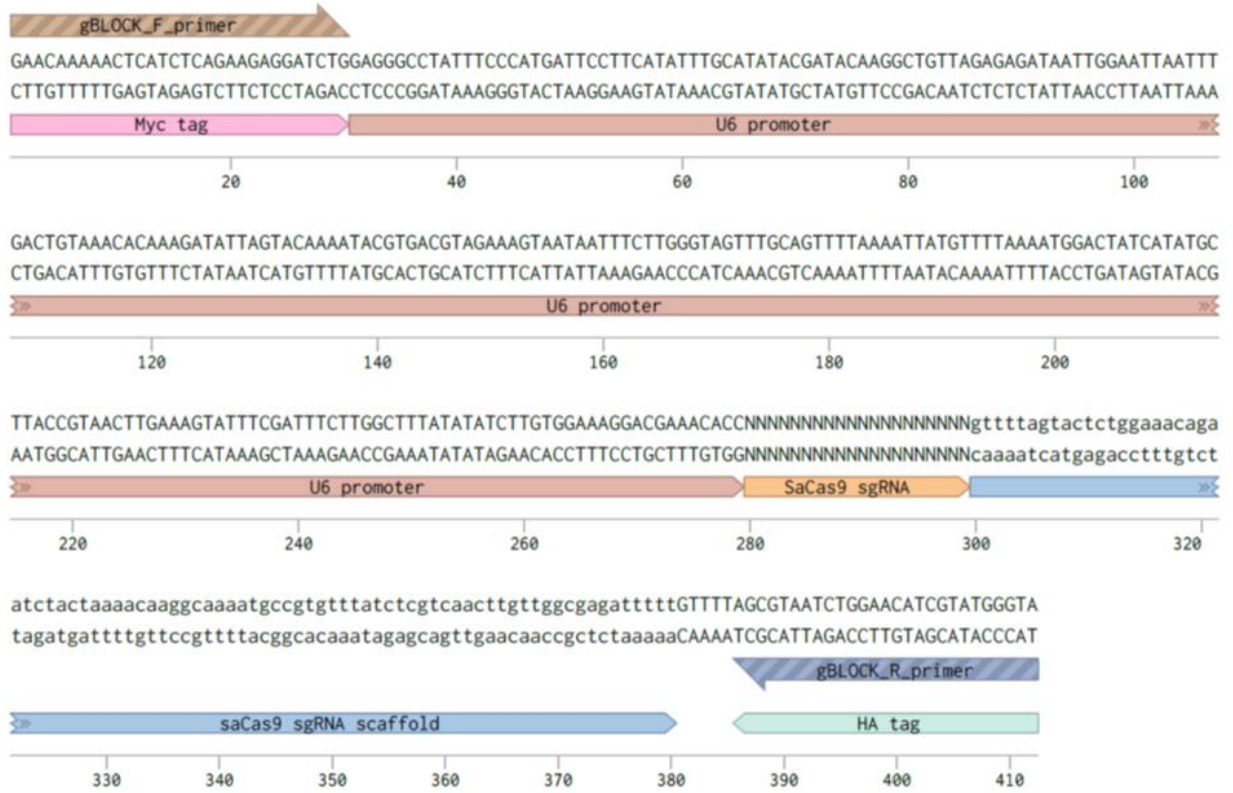

**Supplementary figure 2:** Design of sgRNA expression cassette for SaCas9.

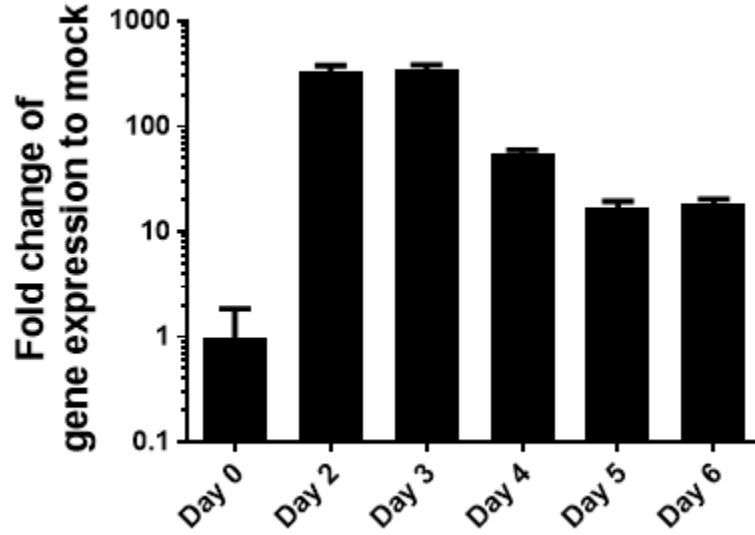

**Supplementary figure 3:** Kinetics of *ASCL1* gene activation using dSpCas9VPR in HEK293A. Results are displayed as the mean of technical triplicates  $\pm$  SEM.

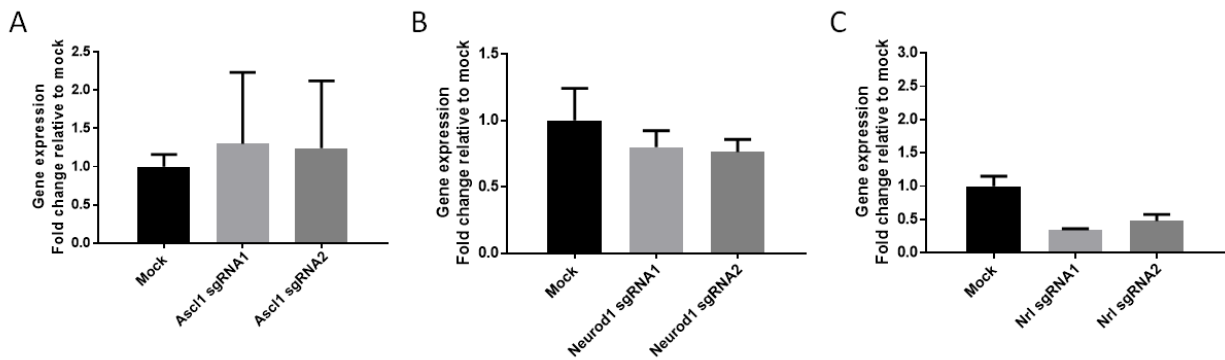

**Supplementary figure 4:** Assessment of multiple sgRNAs for dSpCas9VPR to induce gene activation in rat fibroblast R12 cells. Results are displayed as the mean of three technical repeats  $\pm$  SEM.

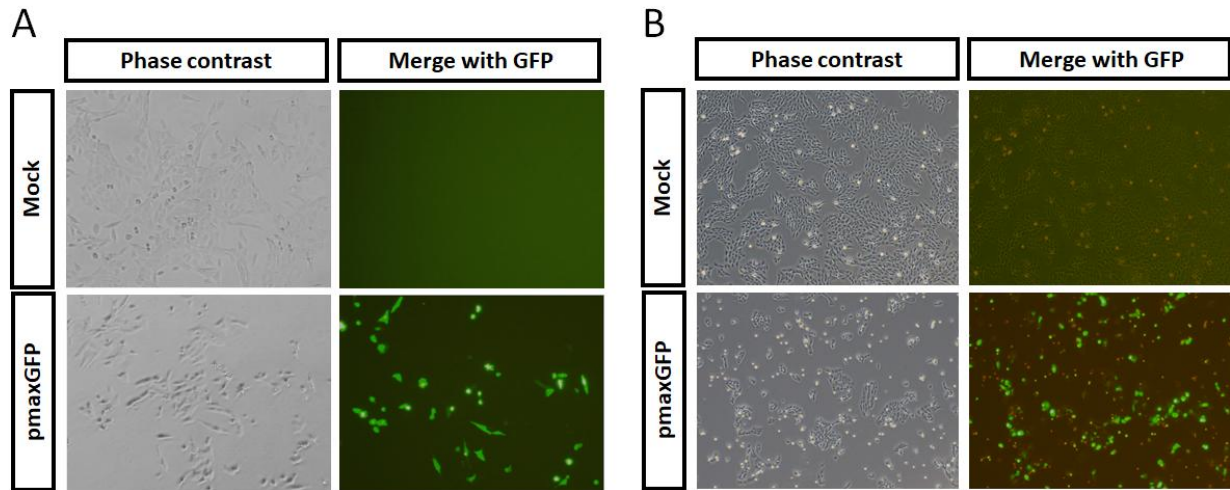

**Supplementary figure 5:** Lipofectamine 3000 allows efficient transfection in A) rat Müller glial cells rMC1 and B) rat fibroblasts R12.

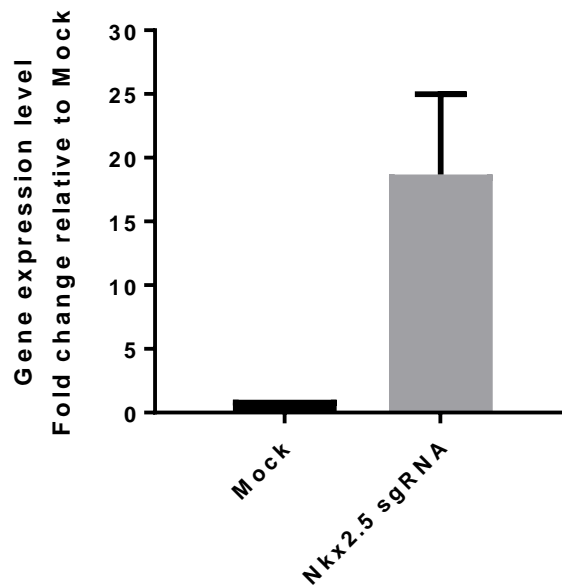

**Supplementary figure 6:** Efficient gene activation using dSpCas9VPR in mouse embryonic fibroblasts. qPCR analysis of gene activation for *Nkx2.5*, results are displayed as the mean of three independent biological repeats  $\pm$  SEM

**Supplementary table 1:** Success rate of designing sgRNAs for SpCas9 and SaCas9 in human cells

| <b>Cas9 activator</b> | <b>Species</b> | <b>Genes/sgRNA</b>                | <b>Number of genes</b> | <b>Success rate</b> |
|-----------------------|----------------|-----------------------------------|------------------------|---------------------|
| dSpCas9VPR            | Human          | Total genes tested                | 15                     | 100%                |
|                       |                | Gene activation with first sgRNA  | 13                     | 86.7%               |
|                       |                | Gene activation with second sgRNA | 1                      | 6.7%                |
|                       |                | Gene activation with third sgRNA  | 1                      | 6.7%                |
| dSaCas9VPR            | Human          | Total genes tested                | 1                      | 100%                |
|                       |                | Gene activation with first sgRNA  | 1                      | 100%                |
